# Supplementary material for: The mutagenic mechanism of oxygenated alkylhydrazones occurs through alkyl radicals and alkyldiazonium ions
Source: Royal Society of Chemistry journal article supplement (doi:10.1039/c6tx00430j), 2017-01-01
Supplement: c6tx00430j1.pdf [file c6tx00430j1.pdf]

**Electronic supplementary information (ESI)**

**The Mutagenic Mechanism of Oxygenated Alkylhydrazones Occurs  
through Alkyl Radicals and Alkyldiazonium Ions**

Keiko Inami<sup>a,b,\*</sup>, Miki Takada<sup>b</sup>, Miho Nagata<sup>b</sup>, Toshinori Higashi<sup>b</sup> and  
Masataka Mochizuki<sup>a,b</sup>

*<sup>a</sup>Faculty of Pharmaceutical Sciences, Tokyo University of Science, 2641 Yamazaki,  
Noda-shi, Chiba 278-8510, Japan; <sup>b</sup>Kyoritsu University of Pharmacy, Shibakoen1-5-30,  
Minato-ku, Tokyo 105-8512, Japan*

Contents

|                                                                                                             |    |
|-------------------------------------------------------------------------------------------------------------|----|
| Mutagenicity of MAPH in <i>Salmonella typhimurium</i> TA1535 and YG3001<br>(Table S1)                       | S1 |
| Mutagenicity of MAPH in <i>Salmonella typhimurium</i> YG7108 (Table S2)                                     | S1 |
| Formation of 8-OHdG (▲) and <i>O</i> <sup>6</sup> -MedG (■) from the reaction of MAPH and DNA<br>(Table S3) | S1 |

Table S1. Mutagenicity of MAPH in *Salmonella typhimurium* TA1535 and YG3001.

| Concentration<br>( $\mu\text{mol}$ ) | Revertants/ plate |       |    |        |       |     |
|--------------------------------------|-------------------|-------|----|--------|-------|-----|
|                                      | TA1535            |       |    | YG3001 |       |     |
| 0                                    | 13                | $\pm$ | 2  | 29     | $\pm$ | 5   |
| 0.5                                  | 18                | $\pm$ | 2  | 31     | $\pm$ | 3   |
| 1.0                                  | 28                | $\pm$ | 3  | 41     | $\pm$ | 4   |
| 2.5                                  | 119               | $\pm$ | 30 | 173    | $\pm$ | 17  |
| 5.0                                  | 295               | $\pm$ | 31 | 495    | $\pm$ | 110 |

Table S2. Mutagenicity of MAPH in *Salmonella typhimurium* YG7108.

| Concentration ( $\mu\text{mol}$ ) | Revertants/ plate |
|-----------------------------------|-------------------|
| 0                                 | 152 $\pm$ 14      |
| 0.005                             | 390 $\pm$ 37      |
| 0.01                              | 507 $\pm$ 33      |
| 0.05                              | 1177 $\pm$ 97     |
| 0.1                               | 2392 $\pm$ 312    |

Table S3. Formation of *O*<sup>6</sup>-MedG and 8-OHdG from the reaction of MAPH and DNA.

| Concentration<br>( $\mu\text{mol}$ ) | <i>O</i> <sup>6</sup> -MedG/ $10^2$ dG | 8-OHdG/ $10^2$ dG |
|--------------------------------------|----------------------------------------|-------------------|
| 0                                    | 0 $\pm$ 0                              | 0 $\pm$ 0         |
| 50                                   | 5.1 $\pm$ 0.6                          | 1.0 $\pm$ 0.2     |
| 100                                  | 6.1 $\pm$ 0.6                          | 1.0 $\pm$ 0.1     |
| 300                                  | 7.5 $\pm$ 1.2                          | 1.6 $\pm$ 0.2     |
